# Supplementary material for: The Phenomics and Expression Quantitative Trait Locus Mapping of Brain Transcriptomes Regulating Adaptive Divergence in Lake Whitefish Species Pairs (Coregonus sp.)
Source: Oxford University Press journal article supplement (doi:10.1534/genetics.108.089938), 2008-09-01
Supplement: genetics.108.089938-1.xls [file genetics.108.089938-1.xls]

## Sheet: combined
Biological Process	GRASP Number	Transcript Identification	Linkage Group	Position (cM)	LR	Additive Effect	PVE
Combined
Iron metabolism	4591	CA056696 [GO] [P09528] Ferritin, middle subunit	36f	107.64	20.282	-0.5237	65.55
Metabolism and energy production	4677	CB516788 Mitochondrial import receptor subunit TOM20 homolog	25m	185.88	119.764	1.5644	92.75
Metabolism and energy production	4828	CB507314 [NR] [NP_445992] Cytochrome c oxidase copper chaperone	31f	20.36	26.0282	0.3566	58.23
Metabolism and energy production	9128	CA058854 Mon2 protein [Mus musculus]	3f	149.22	20.4396	0.4651	50.37
Metabolism and energy production	9203	CA046928 [GO] [P18929] NADH-ubiquinone oxidoreductase chain 1 (EC 1.6.5.3)	10f	12.14	22.365	-0.5159	35.68
Metabolism and energy production	9358	CA041686 [NT] [X60435] H.sapiens gene PACAP for pituitary adenylate cyclase activating polypeptide	34f	66.57	19.804	-0.2846	31.31
Metabolism and energy production	9422	CN442531 [GO] [P00417] Cytochrome c oxidase subunit 3 (EC 1.9.3.1)	2f	79.23	21.0818	-0.9235	59.8
Metabolism and energy production	9792	CK991017 [GO] [P00417] Cytochrome c oxidase subunit 3 (EC 1.9.3.1)	10f	8.01	19.2967	-0.7908	37.88
Metabolism and energy production	10289	CB497891 [GO] [P19536] Cytochrome c oxidase polypeptide 5B, mitochondrial precursor (EC 1.9.3.1)	10f	8.01	21.906	-0.3662	48.24
Metabolism and energy production	11732	CB510673 [GO] [P12787] Cytochrome c oxidase polypeptide 5A, mitochondrial precursor (EC 1.9.3.1)	6m	78.75	19.5902	-0.3928	39.33
Metabolism and energy production	11860	CB492576 [GO] [P16460] Argininosuccinate synthase	29f	32.08	22.991	-0.3078	39.83
Metabolism and energy production	13767	CB493008 [GO] [Q8VEM8] Phosphate carrier protein, mitochondrial precursor (PTP)	36f	107.64	19.5113	-0.6461	69.26
Metal ion sequestration/transport	13765	CB507722 [GO] [P02802] Metallothionein B	36f	107.64	24.8486	-1.1447	71.49
Neural development	2474	CA044952 [GO] [P42281] Acyl-CoA-binding protein homolog (ACBP)	2m	72.76	20.1141	-0.544	40.2
Neural development	3000	CB511888 [GO] [P61857] Tubulin beta-6 chain	36f	105.64	30.0168	-0.6937	80.8
Neural development	3239	CB505181 [GO] [P68373] Tubulin alpha-1C chain	36f	107.64	27.4065	-0.9002	66.7
Neural development	4513	CB497906 [GO] [P62204] Calmodulin (CaM).	36f	107.64	19.9659	-0.6103	65.35
Neural development	7732	CA040841 Tubulin beta-3 chain	25m	229.03	22.8169	0.7529	35.24
Neural development	7899	CA061246 Type 2A phosphatase activator TIP41	1m	319.24	22.3553	-0.6947	51.03
Neural development	10624	CB492276 [GO] [P05213] Tubulin alpha-2 chain (Alpha-tubulin 2) (Alpha-tubulin isotype M- alpha-2).	36f	105.64	20.4789	-0.7695	73.96
Neural development	11646	CA056503 [GO] [P68372] Tubulin beta-2B chain	36f	105.64	19.171	-0.777	61.19
Neural development	13901	CB501671 [GO] [P62204] Calmodulin (CaM).	36f	107.64	19.0726	-1.0586	56.58
Neural plasticity	3067	CB506151 C-type lectin 2 [Anguilla japonica]	10f	10.01	20.1696	-0.3745	35.21
Neural plasticity	10216	CK990473 [NR] [AAC28367] Protein S100-A1	14f	115.66	19.9162	0.1979	29.5
Neural signalling	4324	CB494418 [GO] [P62827] GTP-binding nuclear protein Ran (GTPase Ran)	27m	159.4	19.9528	-0.3788	66.54
Neural signalling	10461	CB500771 [GO] [P08226] Apolipoprotein E precursor (Apo-E).	10f	8.01	19.6789	-0.7526	35.79
Neuronal survival	13091	CB497411 [NR] [XP_417149] M-phase phosphoprotein 8	10f	0.01	19.6713	-0.4351	30.25
Protein degredation	1572	CA060697 [GO] [O70435] Proteasome subunit alpha type 3 (EC 3.4.25.1)	1m	317.24	29.4865	-0.9531	64.14
Protein degredation	9425	CB492318 [GO] [P62991] Ubiquitin	25m	229.03	19.4003	0.9374	31.05
Protein synthesis	2217	CB511442 [GO] [Q64311] Protein N-terminal asparagine amidohydrolase (EC 3.5.1.-)	1m	315.24	29.1189	-0.7298	62.34
Protein synthesis	5926	CA056435 [GO] [Q6ZWU9] 40S ribosomal protein S27	36f	107.64	26.9043	-0.8567	72.96
Protein synthesis	6155	CK990977 [GO] [P99027] 60S acidic ribosomal protein P2	17m	36.9	19.156	-0.5599	35.69
Protein synthesis	10674	CB509079 Oncorhynchus mykiss 12S ribosomal RNA, complete sequence; tRNA-Val, complete sequence and 16S ribosomal RNA	10f	14.14	22.2957	-1.0776	38.67
Protein synthesis	11178	CK990697 [GO] [P14206] 40S ribosomal protein SA (p40) (34/67 kDa laminin receptor)	3f	4.01	22.3801	0.4746	44.58
Protein synthesis	12954	CK991325 [GO] [O55142] 60S ribosomal protein L35a	6m	84.09	20.9176	-0.4997	32.15
Protein synthesis	13190	CA046276 [GO] [P14131] 40S ribosomal protein S16	29f	32.08	23.0466	-0.2991	41
Protein synthesis	13791	CB517024 [GO] [P62082] 40S ribosomal protein S7	36f	107.64	20.9354	-0.8757	63.97
Protein synthesis	15349	CB492169 [GO] [P62843] 40S ribosomal protein S15	10f	20.14	20.4403	-0.521	38.41
RNA synthesis	6388	CB496981 [GO] [Q24320] DNA-directed RNA polymerases I, II, and III subunit RPABC2	28m	70.37	19.1233	0.662	28.82
Stress response	8687	CA051262 Stress-induced-phosphoprotein 1	36f	107.64	28.6818	0.2509	78.49
Transcription regulation	3915	CB492165 Histone H1x	32m	84.25	20.9635	-0.3561	36.62
Transcription regulation	6043	CB499689 [GO] [P40201] Chromodomain-helicase-DNA-binding protein 2 (CHD-2)	1m	128.27	19.0493	-0.2272	38.97
Transcription regulation	15214	CA037026 [GO] [Q60756] Transcription factor 15 (bHLH-EC2 protein)	10f	14.14	21.6735	-0.9063	36.48
Unknown	333	CB514221 [NR] [NP_683732] RNA binding motif protein 5 [Mus musculus]	27m	145.4	26.0692	-0.486	76.72
Unknown	437	CK990835 UNKNOWN	6m	92.09	19.977	-0.7067	42.63
Unknown	1799	CA056572 Uncharacterized protein C6orf72 homolog precursor	36f	99.64	25.853	-0.7217	76.13
Unknown	2297	CB492924 UNKNOWN	25m	301.86	20.2687	-0.2157	29.98
Unknown	4143	CA062818 UNKNOWN	36f	101.64	31.5798	-0.4943	79.86
Unknown	4686	CB515189 UNKNOWN	1m	317.24	24.983	-0.5949	53.35
Unknown	5050	CB494001 UNKNOWN	15f	188.39	20.1398	-0.5982	40.36
Unknown	6213	CB500382 UNKNOWN	25m	233.03	22.9697	0.6596	45.94
Unknown	6765	CB499547 UNKNOWN	15f	186.39	19.7159	-0.2359	46.75
Unknown	6794	CA061847 UNKNOWN	7m	51.64	19.9683	-0.3021	47.97
Unknown	7958	CB511598 UNKNOWN	10f	14.14	24.0582	-0.4814	49.99
Unknown	8497	CK990311 PREDICTED: similar to Cg10671 like [Rattus norvegicus]	10f	12.14	20.8542	-0.5252	34.1
Unknown	8584	CA058762 Transmembrane protein 85	10f	22.14	20.9957	-0.2304	36.56
Unknown	9195	CB488242 UNKNOWN	10f	16.14	25.2364	-0.8809	61.5
Unknown	9654	CA038936 UNKNOWN	3f	6.01	19.1276	0.7321	61.3
Unknown	10425	CA044902 Salmo salar hyperosmotic protein 21 (Shop21) gene, Shop21-2 allele, complete cds	12f	44.46	22.4562	0.6022	63.98
Unknown	10429	CA769647 UNKNOWN	36f	101.64	36.88	-0.8036	81.64
Unknown	10490	CB508658 UNKNOWN	3f	147.22	26.2657	0.5219	56.99
Unknown	11891	CA054876 UNKNOWN	10f	10.01	19.6817	-0.3355	39.12
Unknown	12125	CA050111 UNKNOWN	3f	149.22	19.0143	0.5669	61.9
Unknown	13450	DN047729 UNKNOWN	36f	107.64	26.1357	-1.3075	77.46
Unknown	13600	CA042188 UNKNOWN	1m	315.24	21.039	-0.6115	53.23
Unknown	13784	CA047976 Wu:fc15g08 protein [Danio rerio]	36f	107.64	28.6348	-1.2275	78.31
Unknown	14202	CB492138 UNKNOWN	10f	14.14	20.6233	-0.4368	37.29
Unknown	14563	CK990765 UNKNOWN	24f	121.99	20.8879	-0.5123	32.79
Unknown	14687	CA039175 UNKNOWN	29f	28.01	30.049	0.3285	50.33
Unknown	15234	CA046217 UNKNOWN	10f	16.14	19.1843	-0.4287	37.02
Unknown	15283	CA045203 Type-4 ice-structuring protein precursor	10f	22.14	20.5585	-0.4771	37.93
Unknown	15367	BU965588 UNKNOWN	10f	10.01	23.4297	-0.7389	43.54
Female-only
Hormone transport	7929	CK990828 [GO] [P07309] Transthyretin precursor (Prealbumin)	26m	22.01	19.9871	0.5142	64.28
Immune function	548	CA060294 [GO] [P01027] Complement C4-B precursor	10f	12.14	30.3154	-0.6008	64.68
Immune function	7270	CA064377 [NR] [BAB03284] Complement C4-B precursor	22m	55.89	20.3895	-0.2789	56.72
Metabolism and energy production	266	CN442540 [GO] [P00399] Cytochrome c oxidase subunit 1 (EC 1.9.3.1)	26m	84.68	19.6946	-0.8114	63.8
Metabolism and energy production	12119	CA061980 [NT] [AY692144] Salmo salar Na,K-ATPase alpha subunit isoform 1b/ii (ATP1A1B/ii)	10m	34.91	21.6361	0.7052	70.91
Metabolism and energy production	12164	CB496932 [GO] [P70695] Fructose-1,6-bisphosphatase isozyme 2 (EC 3.1.3.11)	12f	90.19	24.465	0.6276	59.03
Metabolism and energy production	12474	CA045279 [GO] [P06801] NADP-dependent malic enzyme, mitochondrial precursor (EC 1.1.1.40)	10m	36.91	20.9351	0.7312	69.53
Metal ion sequestration/transport	13765	CB507722 [GO] [P02802] Metallothionein B	36f	107.64	23.6774	-1.2454	75.66
Neural development	124	CB497747 [GO] [Q61471] Protein Tob1 (Transducer of erbB-2 1)	26m	88.68	21.1872	-0.4834	77.46
Neural development	1574	CK991293 [NT] [AY423016] Cyclin-G1	12f	90.19	21.6645	0.8551	58.14
Neural development	1972	CA043808 [GO] [Q9W0Y1] Troponin C-akin-1 protein	24f	12.01	24.2242	0.8637	71.46
Neural development	2474	CA044952 [GO] [P42281] Acyl-CoA-binding protein homolog (ACBP)	2m	70.76	22.1912	-0.7052	65.77
Neural development	3068	CB510686 [GO] [P68373] Tubulin alpha-1C chain	36f	107.64	19.8187	-0.8773	71.17
Neural development	4427	CB497444 [GO] [P68134] Actin, alpha cardiac	12f	90.19	22.626	1.0078	58.65
Neural development	4944	CB497600 [NT] [S78264] IP1=CNS myelin P0-like glycoprotein [trout, larval brain, mRNA Partial]	10m	34.91	19.3396	0.6687	68.34
Neural development	7732	CA040841 Tubulin beta-3 chain	25m	48.44	26.6944	0.6556	59.74
Neural development	7732	CA040841 Tubulin beta-3 chain	26m	30.01	20.7091	0.5904	51.34
Neural development	8763	CA062038 MAP kinase-activated protein kinase 3	17m	38.99	20.3482	-0.2712	51.72
Neural development	8811	CB511927 [GO] [P68369] Tubulin alpha chain	36f	107.64	25.6762	-0.7063	80.8
Neural development	10624	CB492276 [GO] [P05213] Tubulin alpha-2 chain (Alpha-tubulin 2) (Alpha-tubulin isotype M- alpha-2)	36f	107.64	23.1437	-0.8039	77.74
Neural development	14866	CB510768 [GO] [Q99P72] Reticulon 4 (Neurite outgrowth inhibitor) (Nogo protein)	2m	70.76	24.663	-0.3665	70.63
Neural development	14866	CB510768 [GO] [Q99P72] Reticulon 4 (Neurite outgrowth inhibitor) (Nogo protein)	7m	84.16	19.602	0.3412	60.78
Neural development/modulation of synaptic functions	1988	CB498012 [GO] [P07214] SPARC precursor (Secreted protein acidic and rich in cysteine) (Osteonectin)	24f	25.18	19.3654	0.5718	68.89
Neural development/modulation of synaptic functions	1988	CB498012 [GO] [P07214] SPARC precursor (Secreted protein acidic and rich in cysteine) (Osteonectin)	26m	36.02	20.5523	0.5623	63.58
Neural plasticity	2909	CB510281 [GO] [P32848] Parvalbumin beta 1	12f	90.19	39.7833	1.9399	76.24
Neural plasticity	3602	CB494309 [NR] [P28770] Ependymin I precursor (EPD-I)	5f	91.86	20.5824	0.7885	57.35
Neural plasticity	12441	CA047471 Stathmin	10m	36.91	19.2081	0.6066	63.96
Neural signalling	6453	CA049920 Adenylyl cyclase-associated protein 1	36f	107.64	19.7798	0.5204	78.02
Neural signalling	10643	CA064321 Adenylyl cyclase-associated protein 1	24f	0.01	19.164	0.4065	50.78
Protein degredation	1572	CA054856 PREDICTED: Danio rerio similar to subtilisin-like kinase SPC4 (LOC794305), mRNA	1m	315.24	23.8148	-0.884	69.2
Protein degredation	7867	CB501163 [GO] [P62991] Ubiquitin	25m	48.44	26.0202	0.5099	58.77
Protein synthesis	1462	CB497637 [GO] [Q9CZX8] 40S ribosomal protein S19	36f	107.64	19.8327	-0.6417	73.17
Protein synthesis	1969	CA052515 [GO] [Q9CXW4] 60S ribosomal protein L11	24f	21.18	19.3749	0.6917	61.23
Protein synthesis	2932	CB493407 [GO] [P97351] 40S ribosomal protein S3a	36f	107.64	20.9239	-0.5775	78.47
Protein synthesis	2990	CA059626 [NT] [BC054626] Danio rerio eukaryotic translation initiation factor 3, subunit 6 interacting protein	11f	34.04	26.1749	0.2319	61.44
Protein synthesis	3441	CA044425 [GO] [P35979] 60S ribosomal protein L12	5f	85.86	21.004	0.4561	48.13
Protein synthesis	3488	CB492855 [GO] [P62242] 40S ribosomal protein S8	5f	93.86	19.3742	0.6483	58.75
Protein synthesis	4472	CB493316 [GO] [P62852] 40S ribosomal protein S25	36f	107.64	25.2079	-0.653	75.47
Protein synthesis	4984	CA052576 [GO] [P62908] 40S ribosomal protein S3	9m	36.97	19.1491	0.3009	48.06
Protein synthesis	5926	CA056435 [GO] [Q6ZWU9] 40S ribosomal protein S27	36f	107.64	20.5754	-0.8445	71.34
Protein synthesis	9376	CA047024 [GO] [P62843] 40S ribosomal protein S15	24f	6.01	24.1692	0.5937	65.91
Protein synthesis	10543	CA061300 [NT] [NM_212587] Danio rerio heterogeneous nuclear ribonucleoprotein A/B (hnrpab)	25m	44.87	22.6048	0.3774	62.17
Protein synthesis	10543	CA061300 [NT] [NM_212587] Danio rerio heterogeneous nuclear ribonucleoprotein A/B (hnrpab)	31f	64.6	21.2808	0.3926	60.61
Protein synthesis	10625	CA061476 [GO] [P62830] 60S ribosomal protein L23	24f	6.01	26.5188	0.6166	71.65
Protein synthesis	10750	CA058685 [GO] [O55142] 60S ribosomal protein L35a	24f	21.18	19.3333	0.6609	59.67
Protein synthesis	10938	CA046053 [GO] [P62852] 40S ribosomal protein S25	6f	83.2	20.3549	0.4618	52.12
Protein synthesis	11104	CB492978 [GO] [Q6ZWU9] 40S ribosomal protein S27	6f	77.5	19.983	0.5599	70.52
Protein synthesis	11178	CK990697 [GO] [P14206] 40S ribosomal protein SA (p40)	1m	183.86	20.8154	0.4728	58.83
Protein synthesis	11178	CK990697 [GO] [P14206] 40S ribosomal protein SA (p40)	6f	83.2	21.4805	0.4831	54.89
Protein synthesis	12306	CB491051 [GO] [P53026] 60S ribosomal protein L10a	1m	128.27	22.2823	0.4269	76.66
Protein synthesis	12306	CB491051 [GO] [P53026] 60S ribosomal protein L10a	1m	185.86	22.9041	0.426	74.38
Protein synthesis	12306	CB491051 [GO] [P53026] 60S ribosomal protein L10a	1m	244.25	20.7898	0.412	71.89
Protein synthesis	12306	CB491051 [GO] [P53026] 60S ribosomal protein L10a	24f	14.01	22.7975	0.4079	70.43
Protein synthesis	12306	CB491051 [GO] [P53026] 60S ribosomal protein L10a	6f	77.5	26.0607	0.414	67.87
Protein synthesis	13814	CA769793 [GO] [P47955] 60S acidic ribosomal protein P1	36f	107.64	26.0146	-1.0926	79.67
Reproductive behavior	3486	CA042790 Oncorhynchus mykiss mRNA for sex hormone-binding globulin	5f	85.86	19.0783	0.3523	44.92
Reproductive behavior/ learning	9108	CA063528 [NR] [Q91167] Isotocin-neurophysin IT 2 precursor	12f	90.19	24.2146	0.926	60.93
Transcription regulation	3662	CA036950 [GO] [P15620] Zinc finger protein 180	10m	32.91	20.7675	1.0115	77.51
Unknown	258	CB511393 UNKNOWN	26m	18.01	23.3729	-0.9387	77.38
Unknown	258	CB511393 UNKNOWN	3f	169.04	22.7887	-0.9514	78.22
Unknown	326	CB496460 [NR] [AAO32675] hyperosmotic glycine rich protein [Salmo salar]	26m	20.01	22.673	-1.115	69.88
Unknown	1629	CB505354 UNKNOWN	36f	107.64	19.9344	-0.5619	70.01
Unknown	2695	CA056096 UNKNOWN	2f	227.55	19.1127	-0.2707	61.82
Unknown	3314	CB509689 UNKNOWN	12f	94.19	20.6986	0.647	61.93
Unknown	4622	CA051032 UNKNOWN	25f	55.04	22.0084	0.3624	63.05
Unknown	5809	CB498203 Pleiotrophic factor-alpha-2 precursor	12m	28.17	22.516	-0.3234	50.94
Unknown	6681	CA047299 UNKNOWN	25m	48.44	21.1095	0.5416	49.65
Unknown	7633	CA038748 UNKNOWN	26m	12.01	21.8	0.6893	70.49
Unknown	9267	CA062534 PREDICTED: Danio rerio hypothetical LOC556254 (LOC556254), mRNA	24f	10.01	21.3571	0.3674	64.09
Unknown	9435	CA055049 UNKNOWN	25m	125.31	21.6301	0.4296	56.97
Unknown	9635	CA055049 UNKNOWN	31f	56.6	19.7168	0.8153	56.89
Unknown	9654	CA038936 UNKNOWN	26m	34.02	19.6928	0.7092	59.03
Unknown	11678	CB517841 UNKNOWN	30m	252.95	19.7709	0.3305	73.63
Unknown	11802	CB492187 Probable tumor suppressor protein MN1	36f	107.64	21.5755	0.7597	75.24
Unknown	11995	CA044548 UNKNOWN	24f	0.01	20.7676	0.5009	52.77
Unknown	12631	CB498100 UNKNOWN	26m	16.01	21.9788	0.4655	68.38
Unknown	13450	DN047729 UNKNOWN	36f	107.64	21.6802	-1.3374	77.39
Unknown	13784	CA047976 Wu:fc15g08 protein [Danio rerio]	36f	107.64	22.197	-1.2302	78.47
Unknown	14687	CA039175 UNKNOWN	29f	32.08	21.6719	0.3375	51.61
Male-only
Blood	334	CA047133 [GO] [P02089] Hemoglobin subunit beta-1	21f	29.51	20.9219	1.0147	70.23
Blood	12965	CK990883 Hemoglobin subunit beta-2	19f	35.65	24.8656	-0.6762	69.35
Immune function	1691	CA054167 Lysozyme C II precursor	12f	0.01	19.3526	-0.1958	56.11
Immune function	7892	CB497859 FK506-binding protein 1A	1m	349.8	28.1854	-0.6981	77.04
Immune function	8053	CK990995 Salmo salar TNF-alpha 2 gene, complete cds	24f	125.99	27.7208	0.7765	75.84
Immune function	11752	CA045023 [GO] [P18572] Basigin precursor (CD147 antigen)	10f	8.01	19.5748	-0.4159	63.63
Immune function	12015	CA055919 Serine/threonine-protein phosphatase 2A 65 kDa regulatory subunit A beta isoform	12m	159.03	23.2487	-0.5004	72.04
Immune function	12431	CB499629 Peptidyl-prolyl cis-trans isomerase	12m	152.47	21.4319	-0.5761	75.74
Immune function	13377	CK991049 Basigin precursor	17f	83.47	24.7566	-0.9351	69.28
Immune function	14850	CB500030 [GO] [P18572] Basigin precursor (CD147 antigen) (Basic immunoglobulin superfamily)	10f	8.01	19.0482	-0.3692	64.27
Iron metabolism	2434	CA062106 [GO] [Q921I1] Serotransferrin precursor (Transferrin) (Siderophilin)	27m	117.4	24.727	0.9861	64.32
Iron metabolism	11987	CA063235 Salmo salar transferrin gene, partial 5' sequence	12m	178.26	21.3922	-0.6072	69.26
Metabolism and energy production	1610	CB511896 [GO] [Q9Z0V8] Mitochondrial import inner membrane translocase subunit Tim17 A	12m	188.26	29.4922	-0.3579	86.33
Metabolism and energy production	4016	BU965824 [GO] [P11404] Fatty acid-binding protein, heart (H-FABP) (Heart-type fatty acid- binding protein)	3f	141.22	25.3267	0.3349	70.99
Metabolism and energy production	4677	CB516788 Mitochondrial import receptor subunit TOM20 homolog	25m	189	51.2145	1.5416	87.11
Metabolism and energy production	4842	CB518061 [GO] [P56384] ATP synthase lipid-binding protein, mitochondrial precursor (EC 3.6.3.14)	2m	8.01	20.7023	-0.8028	63.4
Metabolism and energy production	4938	CA053306 [GO] [P19783] Cytochrome c oxidase subunit 4 isoform 1, mitochondrial precursor (EC 1.9.3.1)	2m	4.01	19.5631	-0.8479	60.89
Metabolism and energy production	5450	CA049433 [NT] [AF338763] Oncorhynchus nerka ferritin-H subunit mRNA, complete cds	24f	125.99	20.1071	0.7714	67.11
Metabolism and energy production	6287	CA062071 [GO] [P56480] ATP synthase subunit beta, mitochondrial precursor (EC 3.6.3.14)	28m	54.63	20.1066	0.6946	60.8
Metabolism and energy production	6287	CA062071 [GO] [P56480] ATP synthase subunit beta, mitochondrial precursor (EC 3.6.3.14)	2m	14.01	19.4808	-0.5929	61
Metabolism and energy production	7703	CA058809 [GO] [P63082] Vacuolar ATP synthase 16 kDa proteolipid subunit (EC 3.6.3.14)	30m	208.48	20.6157	-0.3114	63.16
Metabolism and energy production	8739	CA056913 [GO] [P62814] Vacuolar ATP synthase subunit B, brain isoform (EC 3.6.3.14) (V-ATPase B2 subunit)	12m	180.26	20.8025	-0.3652	68.88
Metabolism and energy production	9663	CA060872 [GO] [P21550] Gamma-enolase	12f	22.46	19.3429	0.3467	55.25
Neural development	5257	CB496664 Myelin expression factor 2	31f	96.73	19.08	-0.4086	58.5
Neural development	8833	CB509509 [GO] [Q00724] Plasma retinol-binding protein precursor (PRBP) (RBP)	3f	143.22	23.96	0.6483	78.03
Neural development	11440	CB510537 [GO] [P15532] Nucleoside diphosphate kinase A (EC 2.7.4.6)	19f	0.01	25.425	0.4753	74.26
Neural development	12443	CB509558 Tyrosine-protein kinase HCK	12m	154.47	19.6842	-0.3772	70.93
Neural development	13177	CB497887 [GO] [Q99P72] Reticulon 4 (Neurite outgrowth inhibitor) (Nogo protein)	24f	125.99	24.1994	0.4647	71.98
Neural plasticity	2823	CK990568 [GO] [P56565] Protein S100-A1	11f	70.43	22.2956	-0.5086	59.5
Neural plasticity	11455	CB504209 [GO] [P56565] Protein S100-A1	11f	78.43	19.0016	-0.3869	73.48
Neural plasticity	12441	CA047471 Stathmin	12m	159.03	24.8145	-0.5124	73.08
Neural plasticity	12612	CA053157 [GO] [P54227] Stathmin (Phosphoprotein p19) (pp19) (Oncoprotein 18)	12m	159.03	24.0533	-0.62	71.49
Neural plasticity	12612	CA053157 [GO] [P54227] Stathmin (Phosphoprotein p19) (pp19) (Oncoprotein 18)	17f	68.98	20.4668	-0.7054	69.67
Neuroprotection	3244	CA052164 [NT] [AJ716203] Oncorhynchus mykiss cyp19b-I gene for P450aromB-I, exons 1-10	24f	125.99	27.6111	0.6605	75.83
Neuroprotection	4040	CA044693 [NR] [AAH56725] Glutathione S-transferase, theta 1 [Danio rerio]	24f	125.99	25.1348	0.4698	72.86
Neuroprotection	4718	CB496449 [GO] [P99029] Peroxiredoxin 5, mitochondrial precursor (EC 1.11.1.15)	31f	147.58	21.1212	-0.2895	66.64
Nueroprotection	8988	CA052881 [GO] [Q9CR47] TGF beta-inducible nuclear protein 1	12f	55.02	19.0995	0.3582	61.43
Protein degredation	4934	CB493047 Small ubiquitin-related modifier 2 precursor	2m	91.85	20.8615	-0.3143	66.78
Protein degredation	10519	CB501475 [GO] [P62991] Ubiquitin	19f	0.01	20.1941	0.4381	64.59
Protein degredation	13838	CA063791 Vacuolar protein sorting-associated protein 28 homolog	12m	178.26	22.88	-0.7151	73.33
Protein folding and maturation	1642	CA050795 [GO] [P63017] Heat shock cognate 71 kDa protein (Heat shock 70 kDa protein 8)	17f	70.98	19.7421	-0.6929	65.87
Protein synthesis	172	CA054560 AP-1 complex subunit mu-1	32m	151.48	22.4244	-0.4737	63.29
Protein synthesis	1024	CB496418 [NR] [AAG22824] 40S ribosomal protein S11 [Salmo salar]	15f	188.39	23.3545	0.8375	72.06
Protein synthesis	2879	CA052607 [GO] [P58252] Elongation factor 2 (EF-2)	15f	188.39	19.6202	0.7519	67.59
Protein synthesis	3513	CB494514 [GO] [Q9VNE9] 60S ribosomal protein L13A	2m	8.01	21.2108	-0.7991	62.75
Protein synthesis	5264	CB515231 [GO] [P35980] 60S ribosomal protein L18	2m	6.01	24.5183	-0.8513	68.48
Protein synthesis	6401	CB494510 [GO] [Q9CXW4] 60S ribosomal protein L11	31f	147.58	21.6844	-0.538	71.12
Protein synthesis	12482	CN442508 Oncorhynchus mykiss 12S ribosomal RNA, complete sequence; tRNA-Val	12m	178.26	20.6335	-0.7672	70.56
Protein synthesis	13111	CA045500 [GO] [P51410] 60S ribosomal protein L9	10f	4.01	19.0446	-0.572	62.76
Protein synthesis	14378	CK990301 [GO] [Q8BP67] 60S ribosomal protein L24	12f	0.01	22.8457	-0.6758	61.79
RNA synthesis	1802	CB512170 Pre-mRNA-processing-splicing factor 8	12f	59.02	22.0989	0.316	71.63
Transcription regulation	11579	CB496947 [GO] [Q08376] Zinc finger protein 161 (Zfp-161)	24f	125.99	23.786	0.955	71.52
Transcription regulation	12633	CA769301 [NT] [AY150299] Oncorhynchus mykiss histone H1-0 (H1f0)	12m	159.03	23.9199	-0.579	72.35
Transcription regulation	13732	CB511606 [GO] [Q7TQH0] Ataxin-2	12f	44.46	20.3522	0.6508	76.65
Transcription regulation	13732	CB511606 [GO] [Q7TQH0] Ataxin-2	12m	178.26	22.4933	-0.6143	70.15
Transport protein	5408	CB515219 [GO] [P41233] ATP-binding cassette, sub-family A, member 1 (ATP-binding cassette transporter 1)	24f	125.99	19.6523	0.5834	65.93
Transport protein	13602	CA053291 Solute carrier family 23 member 1	12f	59.02	27.1552	0.791	80.75
Transport protein	13602	CA053291 Solute carrier family 23 member 1	24f	127.99	28.7499	0.8262	80.64
Unknown	2679	CA040179 UNKNOWN	16m	46.94	23.4616	0.2183	63.63
Unknown	3182	CA061074 WD repeat protein 41	12f	59.02	26.764	0.4966	80.46
Unknown	3182	CA061074 WD repeat protein 41	24f	127.99	27.6582	0.5176	80.95
Unknown	3704	CA056678 UNKNOWN	24f	121.99	26.2125	0.5685	68.95
Unknown	4214	CB496965 UNKNOWN	24f	125.99	25.3728	0.7241	73.37
Unknown	4515	CB501600 UNKNOWN	24f	125.99	23.1939	0.4939	71.02
Unknown	4723	CA038363 UNKNOWN	31f	147.58	19.2534	-0.4402	62.52
Unknown	5205	CA053688 UNKNOWN	24f	125.99	21.9584	0.7929	69.19
Unknown	5405	CK990882 UNKNOWN	17f	83.47	22.5212	-0.8402	66.39
Unknown	5468	CA051563 PREDICTED: Danio rerio similar to hCG1982388, transcript variant 5 (LOC563327), mRNA	24f	125.99	23.8391	0.4354	71.81
Unknown	6190	CA052707 [NR] PREDICTED: hypothetical protein	2m	10.01	26.2699	-0.5844	71.94
Unknown	6213	CB500382 UNKNOWN	3f	0.01	19.0388	0.7174	54.18
Unknown	6414	CA064075 UNKNOWN	24f	125.99	20.207	0.6101	67.05
Unknown	6773	CB510630 UNKNOWN	12m	186.26	20.5568	-0.4367	77.65
Unknown	7165	CA060981 UNKNOWN	26m	48.02	20.9036	0.268	76.22
Unknown	7265	CA047650 UNKNOWN	24f	121.99	24.9638	0.6624	67.07
Unknown	7276	CA054720 UNKNOWN	24f	121.99	30.4462	0.6161	73.77
Unknown	7416	CB505441 UNKNOWN	24f	125.99	24.7047	0.6888	72.46
Unknown	7450	CB496434 UNKNOWN	24f	125.99	26.0933	0.6755	73.92
Unknown	8094	CB493572 UNKNOWN	24f	125.99	26.4303	0.7279	74.53
Unknown	8242	CA064135 [GO] [Q8VDJ3] Vigilin (High density lipoprotein-binding protein) (HDL-binding protein)	24f	121.99	19.8165	0.4493	58.46
Unknown	8989	CA043958 UNKNOWN	12f	57.02	20.753	0.5045	68.94
Unknown	9558	CA054575 UNKNOWN	8m	0.01	21.436	0.3078	58.23
Unknown	9652	CA042703 UNKNOWN	24f	125.99	19	0.7298	65.14
Unknown	10086	CA054105 UNKNOWN	24f	125.99	19.8356	0.5772	66.87
Unknown	10549	CB501290 Transposable element Tcb2 transposase	19f	35.65	21.3234	-0.6367	61.69
Unknown	10966	CK990962 UNKNOWN	24f	123.99	25.4538	0.6084	70.24
Unknown	11132	CB501836 UNKNOWN	24f	125.99	19.1758	1.1657	65.03
Unknown	11169	CA058154 UNKNOWN	24f	125.99	23.4018	0.6757	72.98
Unknown	11737	CK990863 UNKNOWN	24f	125.99	26.9971	0.9253	75.15
Unknown	12048	CA044550 UNKNOWN	24f	125.99	29.5264	0.8308	77.77
Unknown	12868	CB509929 UNKNOWN	5f	25.02	23.2665	-0.6512	73.54
Unknown	12887	CA051144 UNKNOWN	12m	178.26	19.0098	-0.5346	66.44
Unknown	13012	CB511844 UNKNOWN	24f	125.99	29.7836	1.0672	77.8
Unknown	13103	CB489945 UNKNOWN	24f	118.77	19.2686	0.6012	61.58
Unknown	13176	CB506416 Tetratricopeptide repeat protein 35	24f	125.99	27.6306	0.7162	75.65
Unknown	13603	CA040142 UNKNOWN	12f	59.02	22.7196	1.162	75.6
Unknown	13639	CA051610 UNKNOWN	24f	125.99	31.0536	1.0611	83.53
Unknown	13856	CK990921 UNKNOWN	17f	83.47	19.2743	-0.8682	61.71
Unknown	14279	CB510990 UNKNOWN	24f	125.99	24.2386	0.4636	72
