# Supplementary material for: The Phenomics and Expression Quantitative Trait Locus Mapping of Brain Transcriptomes Regulating Adaptive Divergence in Lake Whitefish Species Pairs (Coregonus sp.)
Source: Oxford University Press journal article supplement (doi:10.1534/genetics.108.089938), 2008-09-01
Supplement: genetics.108.089938-2.xls [file genetics.108.089938-2.xls]

## Sheet: Sheet1
Biological Process	GRASP Number	Transcript Identification	Linkage Group	Position (cM)	LR	Additive Effect	PVE
Combined
Hotspot 1
Protein synthesis	2217	CB511442 [GO] [Q64311] Protein N-terminal asparagine amidohydrolase (EC 3.5.1.-)	1m	315.24	29.1189	-0.7298	62.34
Unknown	13600	CA042188 UNKNOWN	1m	315.24	21.039	-0.6115	53.23
Protein degredation	1572	CA060697 [GO] [O70435] Proteasome subunit alpha type 3 (EC 3.4.25.1)	1m	317.24	29.4865	-0.9531	64.14
Unknown	4686	CB515189 UNKNOWN	1m	317.24	24.983	-0.5949	53.35
Neural development	7899	CA061246 Type 2A phosphatase activator TIP41	1m	319.24	22.3553	-0.6947	51.03
Hotspot 2
Neuronal survival	13091	CB497411 [NR] [XP_417149] M-phase phosphoprotein 8	10f	0.01	19.6713	-0.4351	30.25
Metabolism and energy production	9792	CK991017 [GO] [P00417] Cytochrome c oxidase subunit 3 (EC 1.9.3.1)	10f	8.01	19.2967	-0.7908	37.88
Metabolism and energy production	10289	CB497891 [GO] [P19536] Cytochrome c oxidase polypeptide 5B, mitochondrial precursor (EC 1.9.3.1)	10f	8.01	21.906	-0.3662	48.24
Neural signalling	10461	CB500771 [GO] [P08226] Apolipoprotein E precursor (Apo-E).	10f	8.01	19.6789	-0.7526	35.79
Neural plasticity	3067	CB506151 C-type lectin 2 [Anguilla japonica]	10f	10.01	23.4297	-0.7389	43.54
Unknown	11891	CA054876 UNKNOWN	10f	10.01	20.1696	-0.3745	35.21
Unknown	15367	BU965588 UNKNOWN	10f	10.01	19.6817	-0.3355	39.12
Unknown	8497	CK990311 PREDICTED: similar to Cg10671 like [Rattus norvegicus]	10f	12.14	22.365	-0.5159	35.68
Metabolism and energy production	9203	CA046928 [GO] [P18929] NADH-ubiquinone oxidoreductase chain 1 (EC 1.6.5.3)	10f	12.14	20.8542	-0.5252	34.1
Unknown	7958	CB511598 UNKNOWN	10f	14.14	22.2957	-1.0776	38.67
Protein synthesis	10674	CB509079 Oncorhynchus mykiss 12S ribosomal RNA, complete sequence; tRNA-Val, complete sequence and 16S ribosomal RNA	10f	14.14	21.6735	-0.9063	36.48
Unknown	14202	CB492138 UNKNOWN	10f	14.14	24.0582	-0.4814	49.99
Transcription regulation	15214	CA037026 [GO] [Q60756] Transcription factor 15 (bHLH-EC2 protein)	10f	14.14	20.6233	-0.4368	37.29
Unknown	9195	CB488242 UNKNOWN	10f	16.14	25.2364	-0.8809	61.5
Unknown	15234	CA046217 UNKNOWN	10f	16.14	19.1843	-0.4287	37.02
Protein synthesis	15349	CB492169 [GO] [P62843] 40S ribosomal protein S15	10f	20.14	20.4403	-0.521	38.41
Unknown	8584	CA058762 Transmembrane protein 85	10f	22.14	20.9957	-0.2304	36.56
Unknown	15283	CA045203 Type-4 ice-structuring protein precursor	10f	22.14	20.5585	-0.4771	37.93
Hotspot 3
Unknown	1799	CA056572 Uncharacterized protein C6orf72 homolog precursor	36f	99.64	25.853	-0.7217	76.13
Unknown	4143	CA062818 UNKNOWN	36f	101.64	31.5798	-0.4943	79.86
Unknown	10429	CA769647 UNKNOWN	36f	101.64	36.88	-0.8036	81.64
Neural development	3000	CB511888 [GO] [P61857] Tubulin beta-6 chain	36f	105.64	30.0168	-0.6937	80.8
Neural development	10624	CB492276 [GO] [P05213] Tubulin alpha-2 chain (Alpha-tubulin 2) (Alpha-tubulin isotype M- alpha-2).	36f	105.64	20.4789	-0.7695	73.96
Neural development	11646	CA056503 [GO] [P68372] Tubulin beta-2B chain	36f	105.64	19.171	-0.777	61.19
Neural development	3239	CB505181 [GO] [P68373] Tubulin alpha-1C chain	36f	107.64	27.4065	-0.9002	66.7
Neural development	4513	CB497906 [GO] [P62204] Calmodulin (CaM).	36f	107.64	19.9659	-0.6103	65.35
Iron metabolism	4591	CA056696 [GO] [P09528] Ferritin, middle subunit	36f	107.64	20.282	-0.5237	65.55
Protein synthesis	5926	CA056435 [GO] [Q6ZWU9] 40S ribosomal protein S27	36f	107.64	26.9043	-0.8567	72.96
Stress response	8687	CA051262 Stress-induced-phosphoprotein 1	36f	107.64	28.6818	0.2509	78.49
Unknown	13450	DN047729 UNKNOWN	36f	107.64	26.1357	-1.3075	77.46
Metal ion sequestration/transport	13765	CB507722 [GO] [P02802] Metallothionein B	36f	107.64	24.8486	-1.1447	71.49
Metabolism and energy production	13767	CB493008 [GO] [Q8VEM8] Phosphate carrier protein, mitochondrial precursor (PTP)	36f	107.64	19.5113	-0.6461	69.26
Unknown	13784	CA047976 Wu:fc15g08 protein [Danio rerio]	36f	107.64	28.6348	-1.2275	78.31
Protein synthesis	13791	CB517024 [GO] [P62082] 40S ribosomal protein S7	36f	107.64	20.9354	-0.8757	63.97
Neural development	13901	CB501671 [GO] [P62204] Calmodulin (CaM).	36f	107.64	19.0726	-1.0586	56.58
Female-only
Hotspot 1
Transcription regulation	3662	CA036950 [GO] [P15620] Zinc finger protein 180	10m	32.91	20.7675	1.0115	77.51
Neural development	4944	CB497600 [NT] [S78264] IP1=CNS myelin P0-like glycoprotein [trout, larval brain, mRNA Partial]	10m	34.91	19.3396	0.6687	68.34
Metabolism and energy production	12119	CA061980 [NT] [AY692144] Salmo salar Na,K-ATPase alpha subunit isoform 1b/ii (ATP1A1B/ii)	10m	34.91	21.6361	0.7052	70.91
Neural plasticity	12441	CA047471 Stathmin	10m	36.91	19.2081	0.6066	63.96
Metabolism and energy production	12474	CA045279 [GO] [P06801] NADP-dependent malic enzyme, mitochondrial precursor (EC 1.1.1.40)	10m	36.91	20.9351	0.7312	69.53
Hotspot 2
Neural development	1574	CK991293 [NT] [AY423016] Cyclin-G1	12f	90.19	21.6645	0.8551	58.14
Nueral Plastictiy	2909	CB510281 [GO] [P32848] Parvalbumin beta 1	12f	90.19	39.7833	1.9399	76.24
Development	4427	CB497444 [GO] [P68134] Actin, alpha cardiac	12f	90.19	22.626	1.0078	58.65
Reproductive behavior/ learning	9108	CA063528 [NR] [Q91167] Isotocin-neurophysin IT 2 precursor	12f	90.19	24.2146	0.926	60.93
Metabolism and energy production	12164	CB496932 [GO] [P70695] Fructose-1,6-bisphosphatase isozyme 2 (EC 3.1.3.11)	12f	90.19	24.465	0.6276	59.03
Unknown	3314	CB509689 UNKNOWN	12f	94.19	20.6986	0.647	61.93
Hotspot 3
Protein synthesis	9376	CA047024 [GO] [P62843] 40S ribosomal protein S15	24f	6.01	24.1692	0.5937	65.91
Protein synthesis	10625	CA061476 [GO] [P62830] 60S ribosomal protein L23	24f	6.01	26.5188	0.6166	71.65
Unknown	9267	CA062534 PREDICTED: Danio rerio hypothetical LOC556254 (LOC556254), mRNA	24f	10.01	21.3571	0.3674	64.09
Neural development	1972	CA043808 [GO] [Q9W0Y1] Troponin C-akin-1 protein	24f	12.01	24.2242	0.8637	71.46
Protein synthesis	12306	CB491051 [GO] [P53026] 60S ribosomal protein L10a	24f	14.01	22.7975	0.4079	70.43
Protein synthesis	1969	CA052515 [GO] [Q9CXW4] 60S ribosomal protein L11	24f	21.18	19.3749	0.6917	61.23
Protein synthesis	10750	CA058685 [GO] [O55142] 60S ribosomal protein L35a	24f	21.18	19.3333	0.6609	59.67
Neural development/modulation of synaptic functions	1988	CB498012 [GO] [P07214] SPARC precursor (Secreted protein acidic and rich in cysteine) (Osteonectin)	24f	25.18	19.3654	0.5718	68.89
Hotspot 4
Unknown	7633	CA038748 UNKNOWN	26m	12.01	21.8	0.6893	70.49
Unknown	12631	CB498100 UNKNOWN	26m	16.01	21.9788	0.4655	68.38
Unknown	258	CB511393 UNKNOWN	26m	18.01	23.3729	-0.9387	77.38
Unknown	326	CB496460 [NR] [AAO32675] hyperosmotic glycine rich protein [Salmo salar]	26m	20.01	22.673	-1.115	69.88
Hormone transport	7929	CK990828 [GO] [P07309] Transthyretin precursor (Prealbumin)	26m	22.01	19.9871	0.5142	64.28
Neural development	7732	CA040841 Tubulin beta-3 chain	26m	30.01	20.7091	0.5904	51.34
Hotspot 5
Protein synthesis	1462	CB497637 [GO] [Q9CZX8] 40S ribosomal protein S19	36f	107.64	19.8327	-0.6417	73.17
Unknown	1629	CB505354 UNKNOWN	36f	107.64	19.9344	-0.5619	70.01
Protein synthesis	2932	CB493407 [GO] [P97351] 40S ribosomal protein S3a	36f	107.64	20.9239	-0.5775	78.47
Neural development	3068	CB510686 [GO] [P68373] Tubulin alpha-1C chain	36f	107.64	19.8187	-0.8773	71.17
Protein synthesis	4472	CB493316 [GO] [P62852] 40S ribosomal protein S25	36f	107.64	25.2079	-0.653	75.47
Protein synthesis	5926	CA056435 [GO] [Q6ZWU9] 40S ribosomal protein S27	36f	107.64	20.5754	-0.8445	71.34
Neural signalling	6453	CA049920 Adenylyl cyclase-associated protein 1	36f	107.64	19.7798	0.5204	78.02
Neural development	8811	CB511927 [GO] [P68369] Tubulin alpha chain	36f	107.64	25.6762	-0.7063	80.8
Neural development	10624	CB492276 [GO] [P05213] Tubulin alpha-2 chain (Alpha-tubulin 2) (Alpha-tubulin isotype M- alpha-2)	36f	107.64	23.1437	-0.8039	77.74
Unknown	11802	CB492187 Probable tumor suppressor protein MN1	36f	107.64	21.5755	0.7597	75.24
Unknown	13450	DN047729 UNKNOWN	36f	107.64	21.6802	-1.3374	77.39
Metal ion sequestration/transport	13765	CB507722 [GO] [P02802] Metallothionein B	36f	107.64	23.6774	-1.2454	75.66
Unknown	13784	CA047976 Wu:fc15g08 protein [Danio rerio]	36f	107.64	22.197	-1.2302	78.47
Protein synthesis	13814	CA769793 [GO] [P47955] 60S acidic ribosomal protein P1	36f	107.64	26.0146	-1.0926	79.67
Male-only
Hotspot 1
Metabolism and energy production	4938	CA053306 [GO] [P19783] Cytochrome c oxidase subunit 4 isoform 1, mitochondrial precursor (EC 1.9.3.1)	2m	4.01	19.5631	-0.8479	60.89
Protein synthesis	5264	CB515231 [GO] [P35980] 60S ribosomal protein L18	2m	6.01	24.5183	-0.8513	68.48
Protein synthesis	3513	CB494514 [GO] [Q9VNE9] 60S ribosomal protein L13A	2m	8.01	21.2108	-0.7991	62.75
Metabolism and energy production	4842	CB518061 [GO] [P56384] ATP synthase lipid-binding protein, mitochondrial precursor (EC 3.6.3.14)	2m	8.01	20.7023	-0.8028	63.4
Unknown	6190	CA052707 [NR] PREDICTED: hypothetical protein	2m	10.01	26.2699	-0.5844	71.94
Metabolism and energy production	6287	CA062071 [GO] [P56480] ATP synthase subunit beta, mitochondrial precursor (EC 3.6.3.14)	2m	14.01	19.4808	-0.5929	61
Hotspot 2
Iron metabolism	11987	CA063235 Salmo salar transferrin gene, partial 5' sequence	12m	178.26	21.3922	-0.6072	69.26
Protein synthesis	12482	CN442508 Oncorhynchus mykiss 12S ribosomal RNA, complete sequence; tRNA-Val	12m	178.26	20.6335	-0.7672	70.56
Unknown	12887	CA051144 UNKNOWN	12m	178.26	19.0098	-0.5346	66.44
Transcription regulation	13732	CB511606 [GO] [Q7TQH0] Ataxin-2	12m	178.26	22.4933	-0.6143	70.15
Protein degredation	13838	CA063791 Vacuolar protein sorting-associated protein 28 homolog	12m	178.26	22.88	-0.7151	73.33
Metabolism and energy production	8739	CA056913 [GO] [P62814] Vacuolar ATP synthase subunit B, brain isoform (EC 3.6.3.14) (V-ATPase B2 subunit)	12m	180.26	20.8025	-0.3652	68.88
Unknown	6773	CB510630 UNKNOWN	12m	186.26	20.5568	-0.4367	77.65
Metabolism and energy production	1610	CB511896 [GO] [Q9Z0V8] Mitochondrial import inner membrane translocase subunit Tim17 A	12m	188.26	29.4922	-0.3579	86.33
Hotspot 3
Nueroprotection	8988	CA052881 [GO] [Q9CR47] TGF beta-inducible nuclear protein 1	12f	55.02	19.0995	0.3582	61.43
Unknown	8989	CA043958 UNKNOWN	12f	57.02	20.753	0.5045	68.94
RNA synthesis	1802	CB512170 Pre-mRNA-processing-splicing factor 8	12f	59.02	22.0989	0.316	71.63
Unknown	3182	CA061074 WD repeat protein 41	12f	59.02	26.764	0.4966	80.46
Transport protein	13602	CA053291 Solute carrier family 23 member 1	12f	59.02	27.1552	0.791	80.75
Unknown	13603	CA040142 UNKNOWN	12f	59.02	22.7196	1.162	75.6
Hotspot 4
Unknown	3704	CA056678 UNKNOWN	24f	121.99	26.2125	0.5685	68.95
Unknown	7265	CA047650 UNKNOWN	24f	121.99	24.9638	0.6624	67.07
Unknown	7276	CA054720 UNKNOWN	24f	121.99	30.4462	0.6161	73.77
Unknown	8242	CA064135 [GO] [Q8VDJ3] Vigilin (High density lipoprotein-binding protein) (HDL-binding protein)	24f	121.99	19.8165	0.4493	58.46
Unknown	10966	CK990962 UNKNOWN	24f	123.99	25.4538	0.6084	70.24
Neuroprotection	3244	CA052164 [NT] [AJ716203] Oncorhynchus mykiss cyp19b-I gene for P450aromB-I, exons 1-10	24f	125.99	27.6111	0.6605	75.83
Neuroprotection	4040	CA044693 [NR] [AAH56725] Glutathione S-transferase, theta 1 [Danio rerio]	24f	125.99	25.1348	0.4698	72.86
Unknown	4214	CB496965 UNKNOWN	24f	125.99	25.3728	0.7241	73.37
Unknown	4515	CB501600 UNKNOWN	24f	125.99	23.1939	0.4939	71.02
Unknown	5205	CA053688 UNKNOWN	24f	125.99	21.9584	0.7929	69.19
Metabolism and energy production	5408	CB515219 [GO] [P41233] ATP-binding cassette, sub-family A, member 1 (ATP-binding cassette transporter 1)	24f	125.99	19.6523	0.5834	65.93
Metabolism and energy production	5450	CA049433 [NT] [AF338763] Oncorhynchus nerka ferritin-H subunit mRNA, complete cds	24f	125.99	20.1071	0.7714	67.11
Unknown	5468	CA051563 PREDICTED: Danio rerio similar to hCG1982388, transcript variant 5 (LOC563327), mRNA	24f	125.99	23.8391	0.4354	71.81
Unknown	6414	CA064075 UNKNOWN	24f	125.99	20.207	0.6101	67.05
Unknown	7416	CB505441 UNKNOWN	24f	125.99	24.7047	0.6888	72.46
Unknown	7450	CB496434 UNKNOWN	24f	125.99	26.0933	0.6755	73.92
Immune function	8053	CK990995 Salmo salar TNF-alpha 2 gene, complete cds	24f	125.99	27.7208	0.7765	75.84
Unknown	8094	CB493572 UNKNOWN	24f	125.99	26.4303	0.7279	74.53
Unknown	9652	CA042703 UNKNOWN	24f	125.99	19	0.7298	65.14
Unknown	10086	CA054105 UNKNOWN	24f	125.99	19.8356	0.5772	66.87
Unknown	11132	CB501836 UNKNOWN	24f	125.99	19.1758	1.1657	65.03
Unknown	11169	CA058154 UNKNOWN	24f	125.99	23.4018	0.6757	72.98
Transcription regulation	11579	CB496947 [GO] [Q08376] Zinc finger protein 161 (Zfp-161)	24f	125.99	23.786	0.955	71.52
Unknown	11737	CK990863 UNKNOWN	24f	125.99	26.9971	0.9253	75.15
Unknown	12048	CA044550 UNKNOWN	24f	125.99	29.5264	0.8308	77.77
Unknown	13012	CB511844 UNKNOWN	24f	125.99	29.7836	1.0672	77.8
Unknown	13176	CB506416 Tetratricopeptide repeat protein 35	24f	125.99	27.6306	0.7162	75.65
Neural development	13177	CB497887 [GO] [Q99P72] Reticulon 4 (Neurite outgrowth inhibitor) (Nogo protein)	24f	125.99	24.1994	0.4647	71.98
Unknown	13639	CA051610 UNKNOWN	24f	125.99	31.0536	1.0611	83.53
Unknown	14279	CB510990 UNKNOWN	24f	125.99	24.2386	0.4636	72
Unknown	3182	CA061074 WD repeat protein 41	24f	127.99	27.6582	0.5176	80.95
Transport protein	13602	CA053291 Solute carrier family 23 member 1	24f	127.99	28.7499	0.8262	80.64

## Sheet: Sheet2
Hotspot	Number of transcripts	Mean Additive Effect	Mean LR	Mean PVE	Proportion Same Direction	Linkage Group	Location (cM)	Putative Regulatory Gene(s)
Combined Data Set
C1	5	-0.7168	25.3965	56.818	1	1m	316.84
C2	19	-0.489925	21.7284	42.3008	0.95**	10f	18.5
C3	17	-0.774112	25.0799	71.7471	0.94**	36f	106.111
Female Data Set
F1	5	0.74464	20.3773	70.05	1	10m	35.31
F2	6	1.00057	25.5753	62.4867	1	12f	90.8567
F3	7	0.536671	22.7141	63.87	1	24f	6.86714
F4	6	0.0342833	21.7535	66.9583	0.67	26m	19.6767
F5	14	-0.663686	22.1455	75.9014	0.86*	36f	107.64
Male Data Set
M1	6	-0.7464	21.9575	64.7433	1	2m	8.34333
M2	8	-0.549775	22.1575	72.825	1	12m	180.76
M3	6	0.604717	23.0984	73.135	1	12f	58.02
M4	32	0.696594	24.8111	72.0756	1	24f	125.552
* P < 0.01;** P < 0.001

## Sheet: Sheet3
		obs	exp	o-e	o-e^2	o-e^2/e
	P	4	3	1	1	0.333333
	N	2	3	-1	1	0.333333
		6				0.666667
						0.414216
		0.333333
