# Supplementary material for: The Phenomics and Expression Quantitative Trait Locus Mapping of Brain Transcriptomes Regulating Adaptive Divergence in Lake Whitefish Species Pairs (Coregonus sp.)
Source: Oxford University Press journal article supplement (doi:10.1534/genetics.108.089938), 2008-09-01
Supplement: genetics.108.089938-3.doc [file genetics.108.089938-3.doc]

SUPPLEMENTARY TABLES

**Table S1.** Significant eQTL at empirical experiment-wide  = 0.05 for the combined, female-only, and male-only data sets. Transcripts names and numbers follow cGRASP (consortium for Genomic Research on All Salmonids Project, <http://web.uvic.ca/cbr/grasp/>)(Ri*se et a*l. 2004). LG refers to the linkage group within which eQTL were detected and are numbered according to Rogers and Bernatchez (2007) and Rogers *et al.* (2007). Location refers to the mean chromosomal position, in cM, of eQTL. LR, additive effect, and PVE refer to the likelihood ratio, additive effect (with direction provided by (+) or (-) signs), and percentage of variation explained, respectively, for each eQTL.

**Table S2.** Comparison of mRNA levels between *dwarf* and normal whitefish as measured by microarrays and quantitative real-time PCR for two candidate genes expressed in the brain. For real-time PCR results, one-tailed Wilcoxon's rank sum tests were used to determine the *P*-values associated with the differences in mean expression levels between *dwarf* and normal whitefish.

| **Gene** | **Microarray** | | **Real-time PCR** | |
| --- | --- | --- | --- | --- |
| **Fold Change** | ***P*-value** | **Fold Change** | ***P*-value** |
| Beta-globin | 1.67 | 0.02 | 1.56 | 0.001 |
| G-protein | 1.96 | 0.01 | 1.01 | 0.6 |

**Table S3**. Significant eQTL (experiment-wide  = 0.05) within hotspots for the combined, female-only, and male-only data sets. Transcripts names and numbers follow cGRASP (consortium for Genomic Research on All Salmonids Project, <http://web.uvic.ca/cbr/grasp/>)(Ri*se et a*l. 2004). LG refers to the linkage group within which eQTL were detected and are numbered according to Rogers and Bernatchez (2007) and Rogers *et al.* (2007). Location refers to the mean chromosomal position, in cM, of eQTL. LR, additive effect, and PVE refer to the likelihood ratio, additive effect (with direction provided by (+) or (-) signs), and percentage of variation explained, respectively, for each eQTL.
